# Supplementary material for: Saliva microRNA Profile in Children with and without Severe SARS-CoV-2 Infection
Source: MDPI journal article supplement (doi:10.3390/ijms24098175), 2023-05-03
Supplement: s1 [file s1]

| GO Category                                                                                                  | p-value    | #genes | #miRNAs |
|--------------------------------------------------------------------------------------------------------------|------------|--------|---------|
| organelle                                                                                                    | 1.11E-38   | 664    | 4       |
| cellular nitrogen compound metabolic process                                                                 | 1.55E-23   | 342    | 4       |
| ion binding                                                                                                  | 2.10E-19   | 407    | 4       |
| biosynthetic process                                                                                         | 4.68E-15   | 282    | 4       |
| cellular protein modification process                                                                        | 1.05E-11   | 175    | 4       |
| protein binding transcription factor activity                                                                | 1.39E-08   | 52     | 3       |
| Fc-epsilon receptor signaling pathway                                                                        | 1.55E-06   | 21     | 4       |
| nucleic acid binding transcription factor activity                                                           | 5.91E-06   | 79     | 4       |
| enzyme binding                                                                                               | 5.91E-06   | 98     | 4       |
| gene expression                                                                                              | 7.70E-06   | 46     | 2       |
| intrinsic apoptotic signaling pathway                                                                        | 2.07E-05   | 15     | 2       |
| nucleoplasm                                                                                                  | 2.86E-05   | 90     | 3       |
| molecular_function                                                                                           | 4.66E-05   | 1011   | 4       |
| neurotrophin TRK receptor signaling pathway                                                                  | 0.00011209 | 24     | 4       |
| positive regulation of protein insertion into mitochondrial membrane involved in apoptotic signaling pathway | 0.00013167 | 9      | 2       |
| cell death                                                                                                   | 0.00016925 | 71     | 3       |
| cellular_component                                                                                           | 0.00034288 | 1018   | 4       |
| viral process                                                                                                | 0.00043652 | 36     | 3       |
| cytosol                                                                                                      | 0.00060609 | 177    | 4       |
| symbiosis, encompassing mutualism through parasitism                                                         | 0.00071579 | 39     | 3       |
| phosphatidylinositol-mediated signaling                                                                      | 0.00339049 | 17     | 4       |
| catabolic process                                                                                            | 0.00419801 | 119    | 3       |
| biological_process                                                                                           | 0.00521679 | 982    | 4       |
| nervous system development                                                                                   | 0.00571457 | 41     | 3       |
| transcription, DNA-templated                                                                                 | 0.00702432 | 167    | 4       |
| cellular lipid metabolic process                                                                             | 0.01053601 | 15     | 2       |
| protein complex                                                                                              | 0.01496437 | 224    | 4       |
| transforming growth factor beta receptor signaling pathway                                                   | 0.01892793 | 21     | 2       |
| small molecule metabolic process                                                                             | 0.02395639 | 132    | 4       |
| transcription factor binding                                                                                 | 0.02544714 | 51     | 4       |
| Fc-gamma receptor signaling pathway involved in phagocytosis                                                 | 0.02990586 | 9      | 1       |
| response to stress                                                                                           | 0.03227533 | 135    | 4       |
