# Supplementary material for: Saliva microRNA Profile in Children with and without Severe SARS-CoV-2 Infection
Source: MDPI journal article supplement (doi:10.3390/ijms24098175), 2023-05-03
Supplement: s1 [file s1]

| <b>microRNA</b>                 | <b>FC</b> | <b>log2(FC)</b> | <b>p.adjusted</b> | <b>% Present</b> | <b>Mean Count</b> |
|---------------------------------|-----------|-----------------|-------------------|------------------|-------------------|
| hsa-miR-4495                    | 0.19384   | -2.3671         | 9.41E-09          | 100              | 3537.769          |
| hsa-miR-296-5p                  | 0.20192   | -2.3081         | 4.97E-07          | 100              | 1097.779          |
| hsa-miR-548ao-3p                | 0.31594   | -1.6623         | 1.09E-05          | 97.98995         | 153.809           |
| hsa-miR-1273c                   | 0.31251   | -1.678          | 4.62E-05          | 98.99497         | 384.4271          |
| hsa-miR-498                     | 0.16548   | -2.5953         | 0.000439          | 98.99497         | 298.5678          |
| hsa-miR-616-5p                  | 0.40931   | -1.2887         | 0.000515          | 100              | 3156.618          |
| hsa_piR_001928/gb/DQ572564/Homo | 0.35087   | -1.511          | 0.001287          | 81.90955         | 95.19095          |
| hsa_piR_009518/gb/DQ582846/Homo | 0.40585   | -1.301          | 0.00142           | 90.95477         | 186.2362          |
| hsa-miR-4472                    | 0.33642   | -1.5717         | 0.00142           | 99.49749         | 192.6734          |
| hsa-miR-6879-3p                 | 0.44743   | -1.1603         | 0.001653          | 99.49749         | 145.1256          |
| hsa-miR-548m                    | 0.3592    | -1.4772         | 0.002367          | 97.98995         | 101.7739          |
| hsa-miR-1270                    | 0.34708   | -1.5266         | 0.002676          | 99.49749         | 267.5377          |
| hsa-miR-4513                    | 2.218     | 1.1492          | 0.002752          | 91.9598          | 42.9598           |
| hsa-miR-6878-3p                 | 0.3998    | -1.3227         | 0.004068          | 99.49749         | 179.4774          |
| hsa-miR-6715b-3p                | 2.0014    | 1.001           | 0.004421          | 96.98492         | 43.04523          |
| hsa-miR-6856-5p                 | 0.37045   | -1.4326         | 0.004467          | 100              | 169.0804          |
| hsa-miR-874-3p                  | 2.4697    | 1.3043          | 0.005694          | 98.49246         | 55.74372          |
| hsa-miR-7152-5p                 | 0.36713   | -1.4457         | 0.005895          | 100              | 186.8693          |
| hsa-miR-516b-3p                 | 0.47861   | -1.0631         | 0.006219          | 96.48241         | 55.85427          |
| hsa_piR_016945/gb/DQ593356/Homo | 2.5562    | 1.354           | 0.006427          | 96.48241         | 114.8191          |
| hsa-miR-24-1-5p                 | 0.43562   | -1.1989         | 0.007437          | 98.99497         | 80.30653          |
| hsa-miR-6728-5p                 | 3.034     | 1.6012          | 0.007775          | 99.49749         | 165.1407          |
| hsa-miR-5690                    | 0.48792   | -1.0353         | 0.009766          | 100              | 214.9196          |
| hsa-miR-187-5p                  | 0.49792   | -1.006          | 0.010479          | 100              | 88.62312          |
| hsa-miR-149-3p                  | 2.591     | 1.3735          | 0.013385          | 98.49246         | 70.72362          |
| hsa-miR-6895-3p                 | 0.49994   | -1.0002         | 0.013882          | 98.49246         | 95.50251          |
| hsa-miR-3193                    | 0.38145   | -1.3904         | 0.016193          | 98.99497         | 287.5327          |
| hsa-miR-4743-3p                 | 0.45896   | -1.1236         | 0.01665           | 97.98995         | 52.1206           |
| hsa-miR-6812-3p                 | 2.5       | 1.3219          | 0.016924          | 95.9799          | 50.44724          |
| hsa-miR-3192-3p                 | 0.44479   | -1.1688         | 0.019018          | 100              | 187.8894          |
| hsa-miR-4453                    | 0.37022   | -1.4335         | 0.020932          | 97.98995         | 106.3518          |
| hsa-miR-4506                    | 0.42712   | -1.2273         | 0.021386          | 96.98492         | 44.03015          |
| hsa-miR-4537                    | 0.46638   | -1.1004         | 0.021386          | 98.99497         | 203.7186          |
| hsa-miR-4423-3p                 | 0.33604   | -1.5733         | 0.02258           | 97.48744         | 102.995           |
| hsa-miR-3157-3p                 | 0.4705    | -1.0877         | 0.025754          | 97.48744         | 97.11055          |
| hsa-miR-202-3p                  | 0.41219   | -1.2786         | 0.025754          | 99.49749         | 178.0101          |
| hsa-miR-33a-3p                  | 4.26      | 2.0908          | 0.026021          | 97.98995         | 55.54271          |
| hsa-miR-6762-3p                 | 0.49678   | -1.0093         | 0.033361          | 99.49749         | 92.74874          |
| hsa-miR-6747-3p                 | 2.0515    | 1.0367          | 0.034772          | 95.9799          | 55.38191          |
| hsa-miR-6511b-3p                | 0.42862   | -1.2222         | 0.036275          | 100              | 176.598           |
| hsa-miR-6844                    | 2.0919    | 1.0648          | 0.040381          | 93.46734         | 53.42211          |

|                |        |        |          |          |          |
|----------------|--------|--------|----------|----------|----------|
| hsa-miR-4478   | 2.3676 | 1.2434 | 0.043618 | 99.49749 | 130.9799 |
| hsa-miR-188-3p | 2.4795 | 1.3101 | 0.044143 | 99.49749 | 79.28141 |
